# Supplementary material
Source: PubMed Central journal article supplement (PMC3689188)
Supplement: Supp_Fig2.pdf [file Supp_Fig2.pdf]

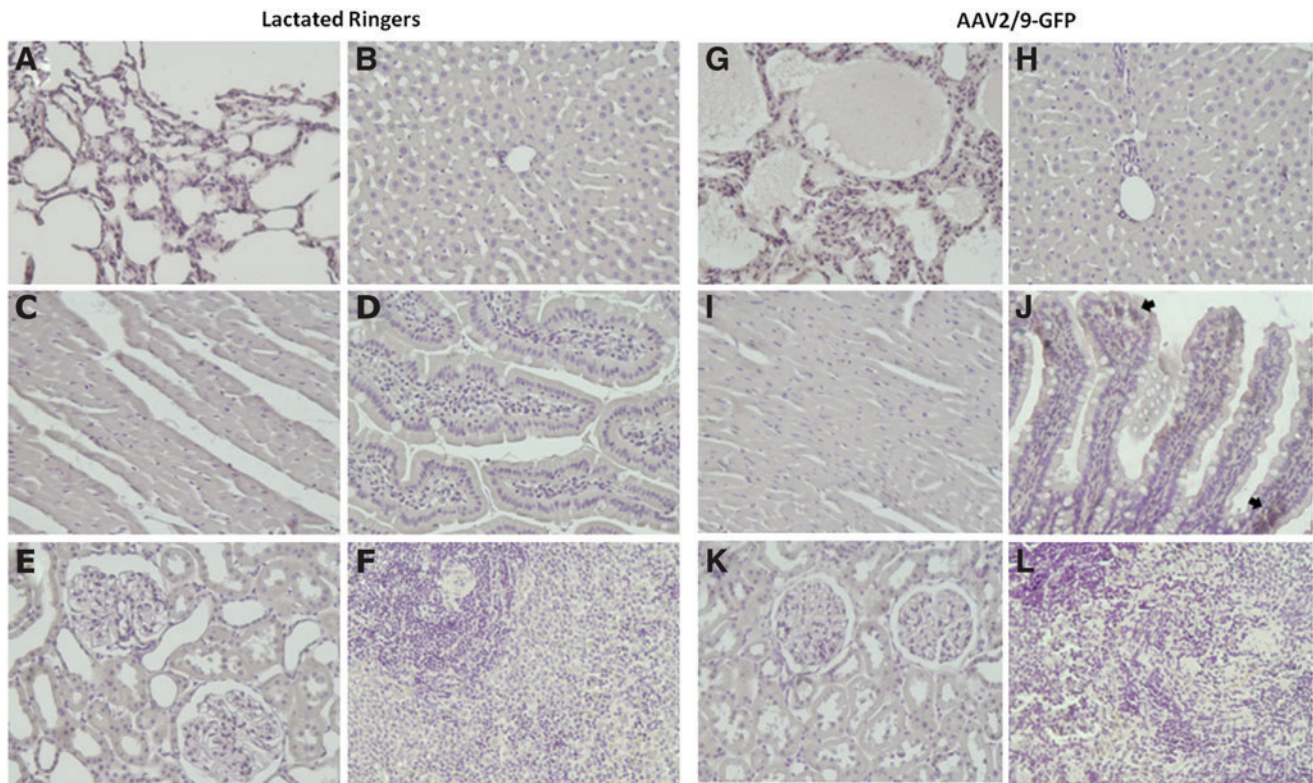

**SUPPLEMENTARY FIG. S2.** Evaluation of vector spread at the cellular level. Animal tissues, collected 15 weeks after salivary gland transduction ( $n=4$  each), reacted with anti-GFP (1:300). (A–F) Lactated Ringers-treated and (G–L) AAV2/9-GFP-treated tissues. (A and G) Lung; (B and H) liver; (C and I) heart; (D and J) intestines; (E and K) kidney; (F and L) spleen. Magnification, 200 $\times$ . Arrows indicate GFP localization.
