# Supplementary material
Source: PubMed Central journal article supplement (PMC3689188)
Supplement: Supp_Fig3.pdf [file Supp_Fig3.pdf]

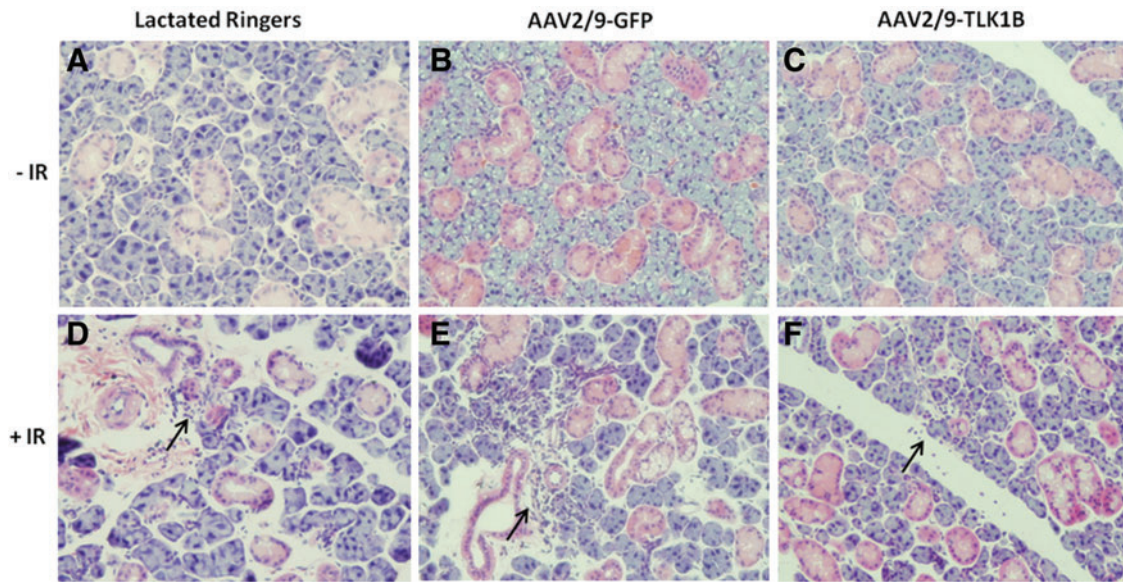

**SUPPLEMENTARY FIG. S3.** Histopathological manifestations after irradiation. Hematoxylin and eosin stain of salivary gland secretions pretreated with (A and D) lactated Ringers, (B and E) AAV9-GFP, and (C and F) AAV9-TLK1B. (A–C) Nonirradiated (–IR) glands. (D–F) Eight weeks after completion of radiation (+IR). Arrows point to inflammatory infiltrate. +IR, radiated; –IR, nonirradiated. Magnification, 200 $\times$ .
