# Supplementary material
Source: PubMed Central journal article supplement (PMC3689188)
Supplement: Supp_Fig4.pdf [file Supp_Fig4.pdf]

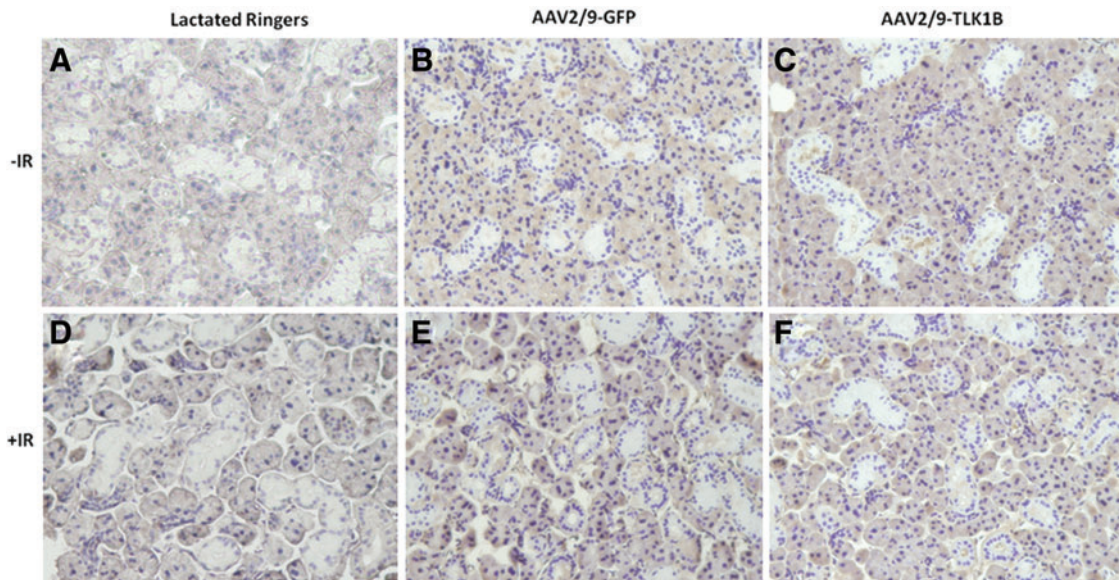

**SUPPLEMENTARY FIG. S4.** Immunohistochemical localization of GRPs in rat submandibular glands. Paraffin sections of salivary glands transduced with (A and D) lactated Ringers, (B and E) AAV2/9-GFP, or (C and F) AAV2/9-TLK1B were reacted with GRP antibody (1:300). (A–C) Nonirradiated (–IR) and (D–F) irradiated (+IR) tissues. Magnification, 200 $\times$ . GRPs, glutamate–glutamic acid-rich proteins.
